# Supplementary material for: Tritopic linker-integrated fluorescent bismuth nanosheets for sensitive pesticide detection in agricultural samples
Source: Royal Society of Chemistry journal article supplement (doi:10.1039/d5en00467e), 2026-01-01
Supplement: d5en00467e1.pdf [file d5en00467e1.pdf]

## **Tritopic Linker-Integrated Fluorescent Bismuth Nanosheets for Sensitive Pesticide Detection in Agricultural Samples**

Deepak Dabur<sup>a†</sup>, Ya-Ching Chang Chien<sup>a†</sup>, Priyanka Rana<sup>a</sup> Hui-Fen Wu<sup>\*a, b, c, d, e, f</sup>

<sup>a</sup>Department of Chemistry, National Sun Yat-Sen University, Kaohsiung, 70, Lien-Hai Road, Kaohsiung, 80424, Taiwan.

<sup>b</sup>School of Pharmacy, College of Pharmacy, Kaohsiung Medical University, Kaohsiung, 80708, Taiwan.

<sup>c</sup>Institute of Precision Medicine, College of Medicine, National Sun Yat-Sen University, Kaohsiung, 80424, Taiwan.

<sup>d</sup> Institute of Medical Science and Technology, National Sun Yat-Sen University, Kaohsiung, 80424, Taiwan.

<sup>e</sup>School of Medicine, College of Medicine, National Sun Yat-Sen University, Kaohsiung, 80424, Taiwan.

<sup>f</sup>Institute of BioPharmaceutical Science, National Sun Yat-Sen University, Kaohsiung, 80424, Taiwan.

\*Corresponding author,

Prof Hui-Fen Wu (Department of Chemistry, National Sun Yat-Sen University)

---

Phone: +886-7-5252000-3955; Fax: +886-7-5253909

Email: [hwu@faculty.nsysu.edu.tw](mailto:hwu@faculty.nsysu.edu.tw)

† Author share equal contribution for the first author.

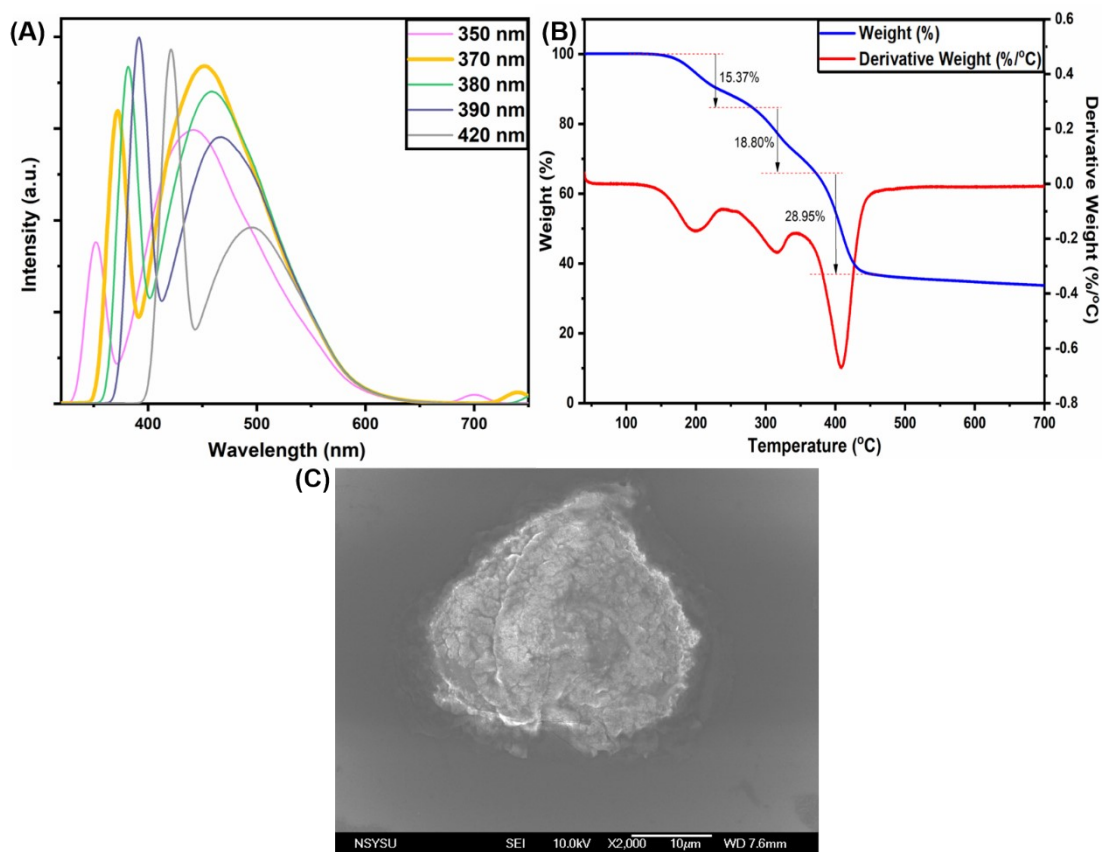

**Figure S1.** (A) PL emission response of Bi(TMA) under different excitation wavelengths (B) Thermo gravimetric analyses (TGA) of Bi(TMA) NSs (C) SEM image for Bi(TMA) NSs.

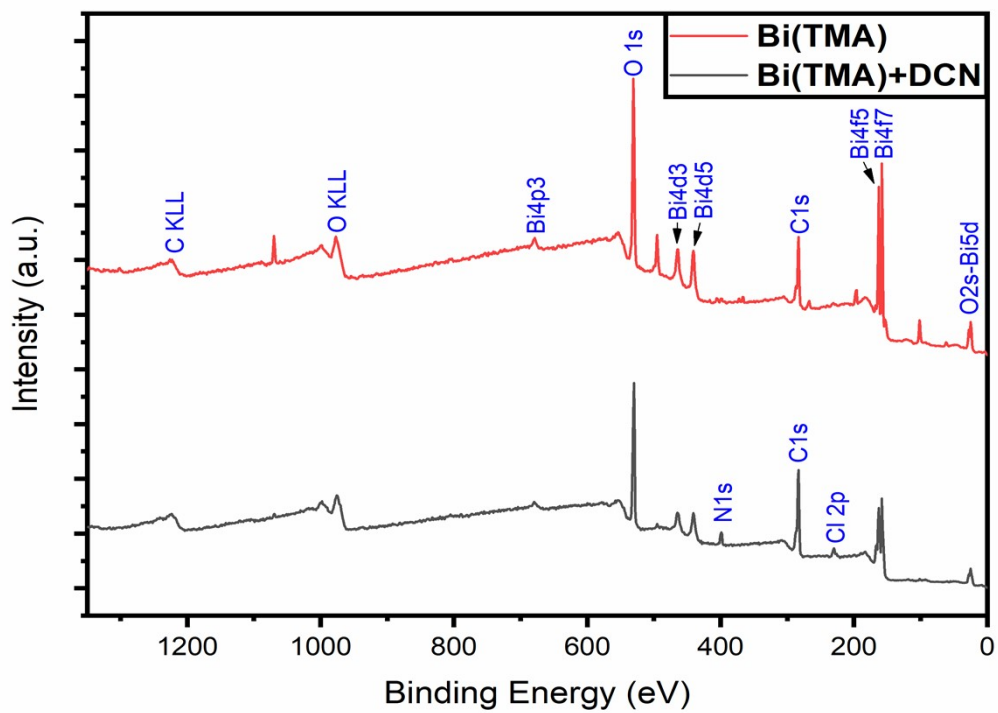

**Figure**

**re S2.** Survey scan of XPS spectrum for the Bi(TMA) NSs before and after adding DCN.

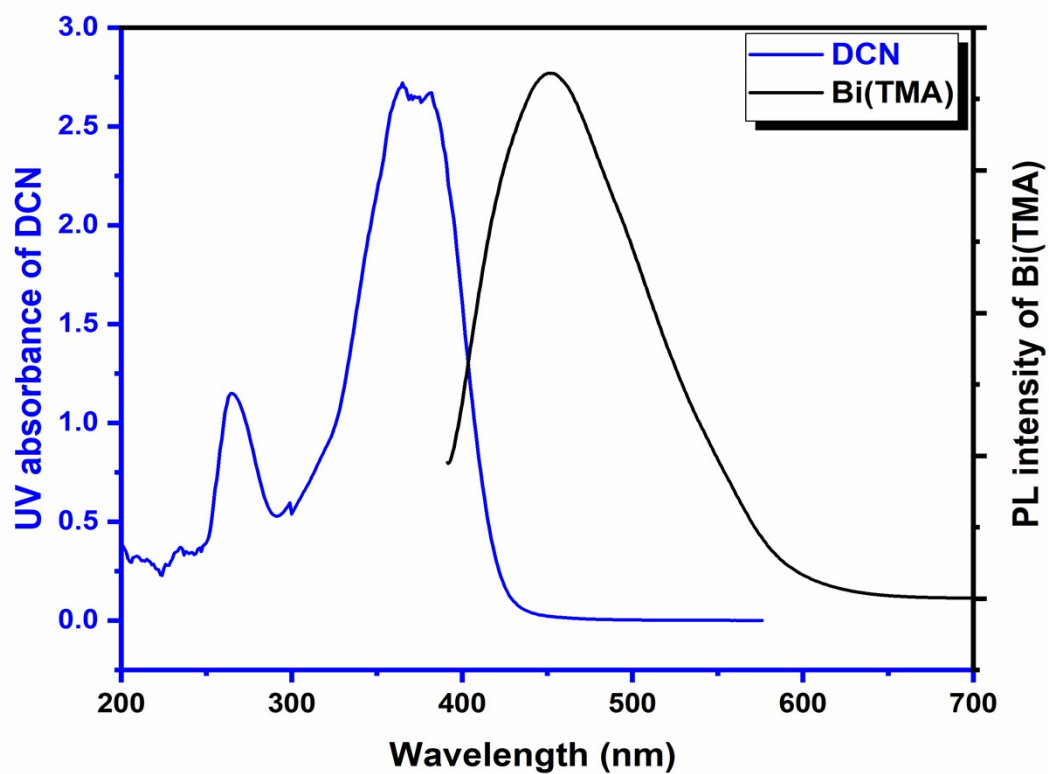

**Figure S3.** Combined spectra for UV absorbance of DCN and PL emission of Bi(TMA); the Y-axis of left side is the UV absorption, and the Y-axis of right side is the PL intensity.

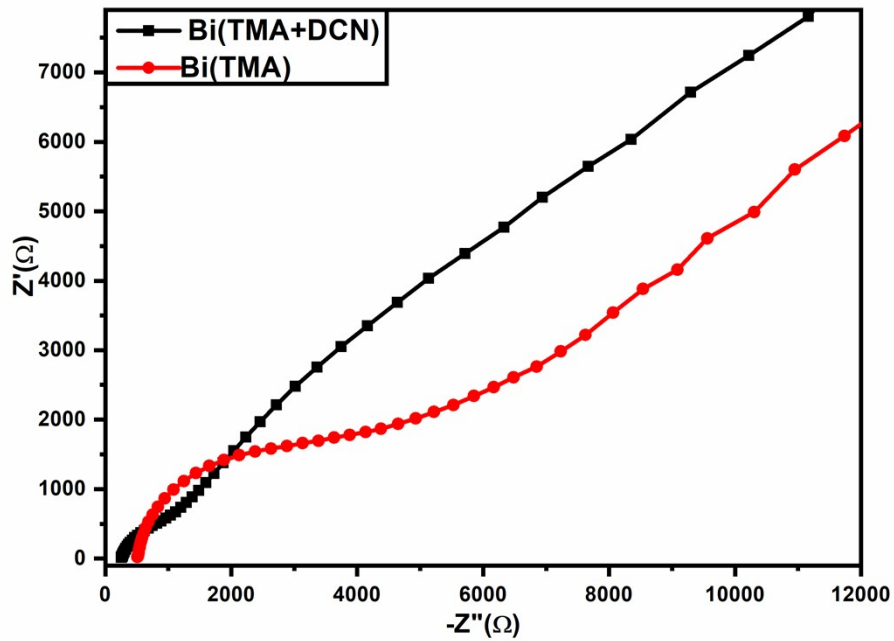

**Figure S4.** Electrochemical kinetics study for Bi(TMA) before and after adding DCN using EIS.

**EIS Calculations:**

$$K^0 = RT/n^2F^2ACR_{ct}$$

**Constants & conversions used**

$$R = 8.314462618 \text{ Jmol}^{-1}\text{K}^{-1}$$

$$T = 298.15 \text{ K (room temp)}$$

$$n = 1$$

$$F = 96500 \text{ Cmol}^{-1}$$

$$C = 0.005 \text{ M} = 0.005 \text{ molL}^{-1} = 5.0 \text{ molm}^{-3}$$

$$\text{electrode area } A = 7.065 \text{ mm}^2 = 7.065 \times 10^{-6} \text{ m}^2$$

$$R_{ct}(\text{Bi-TMA}) = 4.35 \text{ k}\Omega = 4350 \Omega$$

$$R_{ct}(\text{Bi-TMA+DCN}) = 958 \Omega$$

$$K^0(\text{Bi-TMA}) = 8.314462618 \times 298.15 / (1)^2 (96500)^2 (7.065 \times 10^{-6}) (5.0) (4350)$$

$$\approx 1.73 \times 10^{-6} \text{ s}^{-1}$$

$$K^0(\text{Bi-TMA+DCN})_{\text{complex}} = \approx 7.87 \times 10^{-6} \text{ s}^{-1}$$

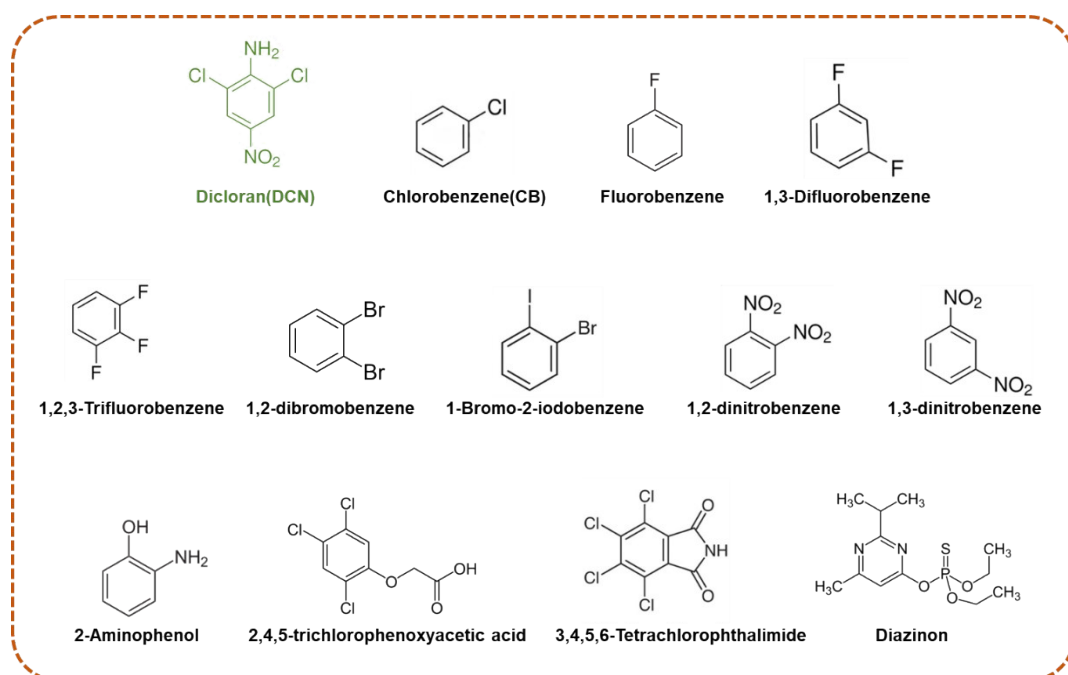

**Figure S5.** Structures of all analytes used in this study, the green color of the compound is the DCN.

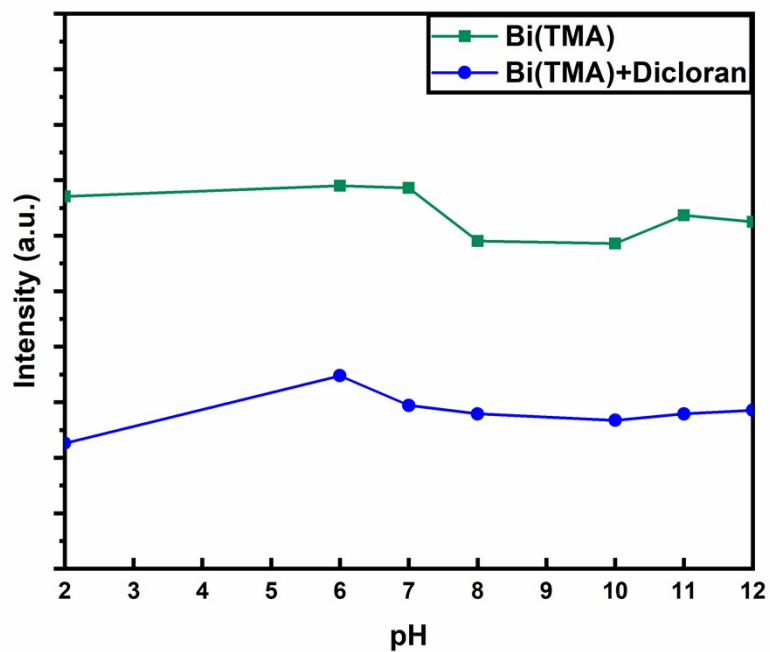

**Figure S6.** pH studies of the 2D Bi(TMA) with and without the addition of the DCN.

**Table S1.** The table of safe tolerance of pesticide residues of compared with the standard values of R.O.C (Taiwan).

| Food     | MRLs    |              |
|----------|---------|--------------|
| Scallion | 2.0 ppm | 10.6 $\mu$ M |
| Peanut   | 0.1 ppm | 0.5 $\mu$ M  |

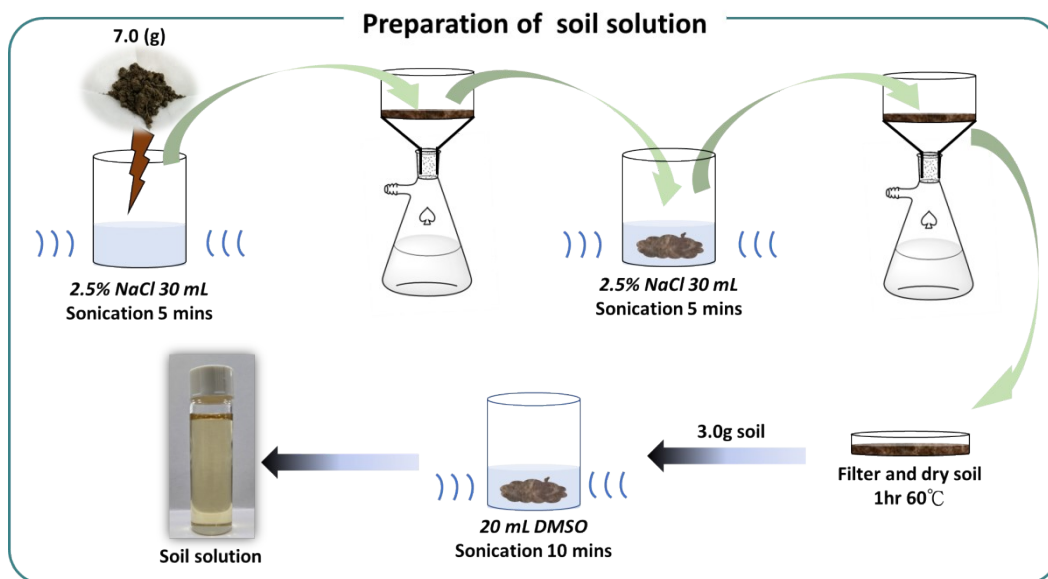

**Figure S7.** A schematic diagram for the real sample preparation from soil.

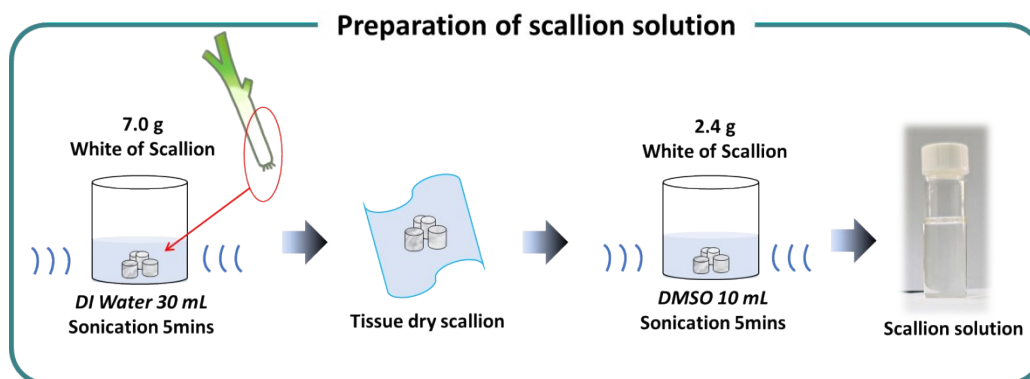

**Figure S8.** A schematic diagram for the real sample preparation from scallion.

**LOD Calculations:**

$$y = 0.00258x + 0.02194$$

$$\text{Slope} = 0.4127$$

$$\text{SD} = \text{Intercept}/1000$$

$$\text{LOD} = 3.3 \times \frac{S.D}{\text{Slope}}$$

$$LOD = 3.3 \times \frac{0.02194/1000}{0.00258}$$

$$LOD = \mathbf{0.03 \text{ nM}}$$
